# Supplementary material
Source: Royal Society of Chemistry journal article supplement (doi:10.1039/d6ta00908e)
Supplement: d6ta00908e1.pdf [file d6ta00908e1.pdf]

***Supporting Information***

**Porous Coordination Polymer-Stabilized Rhodium Single-Atom Catalyst for  
Regioselective Hydroformylation**

Huiying Liao,<sup>a</sup> Ji Ding,<sup>a</sup> Jiaming Wang,<sup>b</sup> Xiuge Zhao,<sup>a</sup> Enting Shi,<sup>a</sup> Sheng Dai,<sup>b,\*</sup> Haijing  
Wang,<sup>c,\*</sup> Zhenshan Hou<sup>a,\*</sup>

<sup>a</sup>State Key Laboratory of Green Chemical Engineering and Industrial Catalysis, Research Institute of Industrial Catalysis, School of Chemistry & Molecular Engineering, East China University of Science and Technology, Shanghai 200237, China.

<sup>b</sup>Key Laboratory for Advanced Materials and Feringa Nobel Prize Scientist Joint Research Center, Institute of Fine Chemicals, School of Chemistry & Molecular Engineering, East China University of Science and Technology, Shanghai 200237, China.

<sup>c</sup>State Key Laboratory of Petroleum Molecular & Process Engineering, SINOPEC Research Institute of Petroleum Processing Co., Ltd., Beijing 100083, China.

\*Corresponding author:

E-mail: [wanghaijing.ripp@sinopec.com](mailto:wanghaijing.ripp@sinopec.com) (H. Wang); [shengdai@ecust.edu.cn](mailto:shengdai@ecust.edu.cn) (S. Dai);  
[houzhenshan@ecust.edu.cn](mailto:houzhenshan@ecust.edu.cn) (Z. Hou)

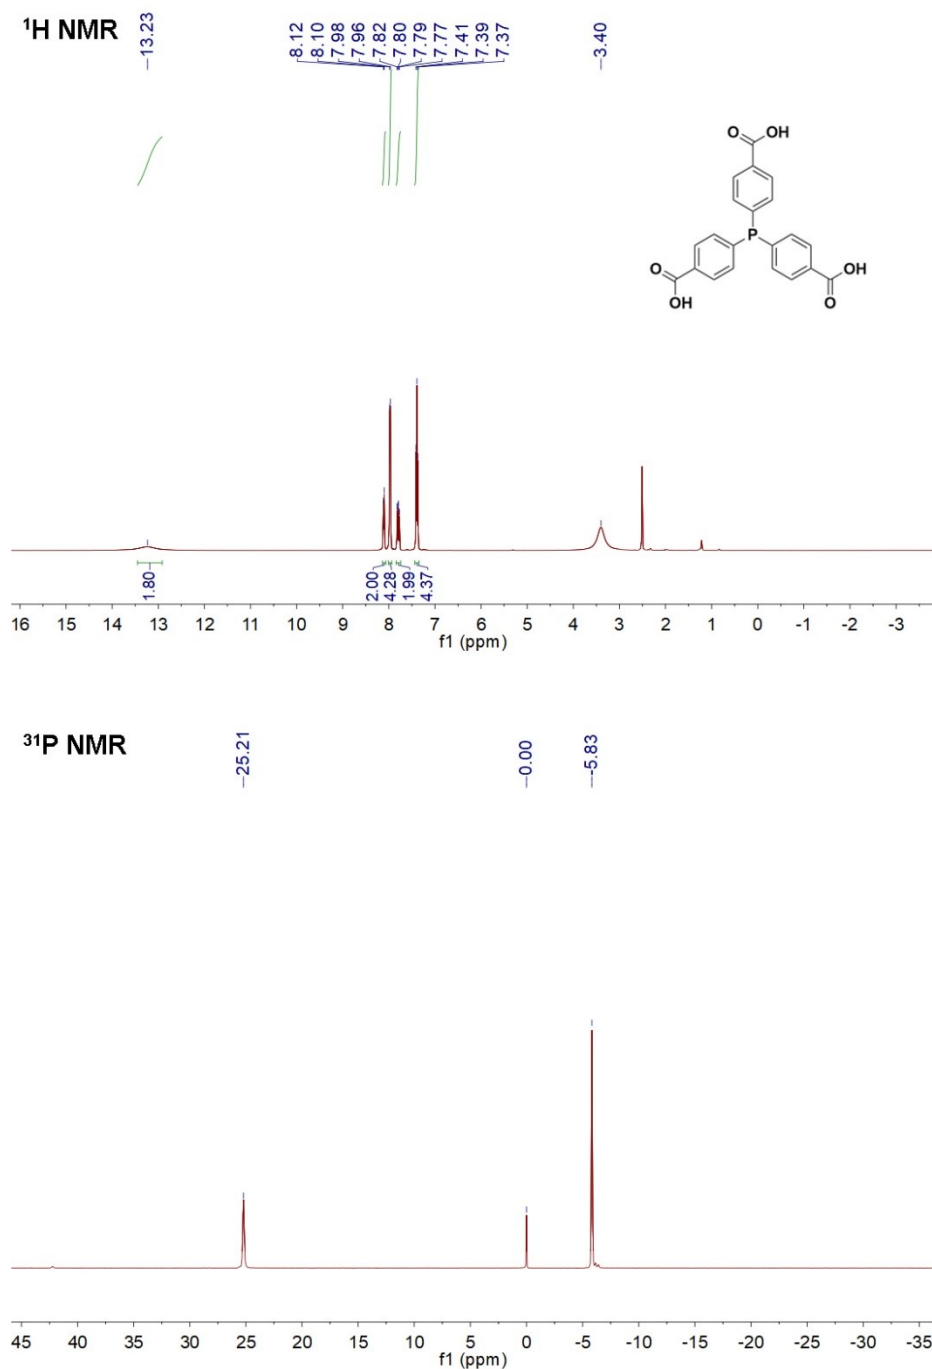

Fig. S1. The <sup>1</sup>H NMR and <sup>31</sup>P NMR of tri(*p*-tolyl)phosphine. <sup>1</sup>H NMR (400 MHz, DMSO-*d*<sub>6</sub>): δ = 13.23 (s, 2H), 8.14-8.07 (m, 2H, arom), 7.97 (d, 4H, arom., *J* = 7.1 Hz), 7.83-7.75 (m, 2H, arom.), 7.39 (t, 4H, arom., *J* = 7.8 Hz). <sup>31</sup>P NMR (243 MHz, DMSO-*d*<sub>6</sub>): δ = -5.83 (s, 1P).

Table S1. ICP-OES analysis of the catalysts.

| Catalysts     | Rh (wt%) |
|---------------|----------|
| 0.08Rh/Zr-HTP | 0.08     |
| 0.19Rh/Zr-HTP | 0.19     |
| 0.54Rh/Zr-HTP | 0.54     |
| 0.92Rh/Zr-HTP | 0.92     |

Table S2. Fitting parameters of solid-state  $^{31}\text{P}$  NMR.

| Catalysts     | P species       | Chemical shift<br>(ppm) | Peak area          | Percentage<br>(%) |
|---------------|-----------------|-------------------------|--------------------|-------------------|
| 0.19Rh/Zr-HTP | uncoordinated P | -7.4                    | $6.35 \times 10^9$ | 63.9              |
|               | P=O             | 25.2                    | $2.13 \times 10^9$ | 21.5              |
|               | P-Rh            | 33.4                    | $1.45 \times 10^9$ | 14.6              |
| Zr-HTP        | uncoordinated P | -7.4                    | $6.27 \times 10^9$ | 71.7              |
|               | P=O             | 25.2                    | $2.48 \times 10^9$ | 28.3              |

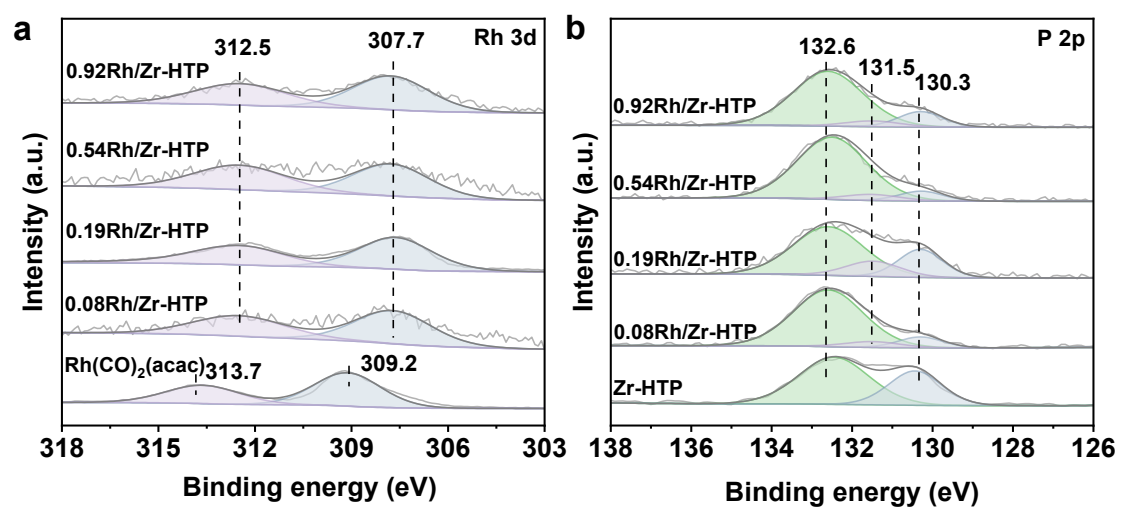

Fig. S2. The XPS spectra of different catalysts.

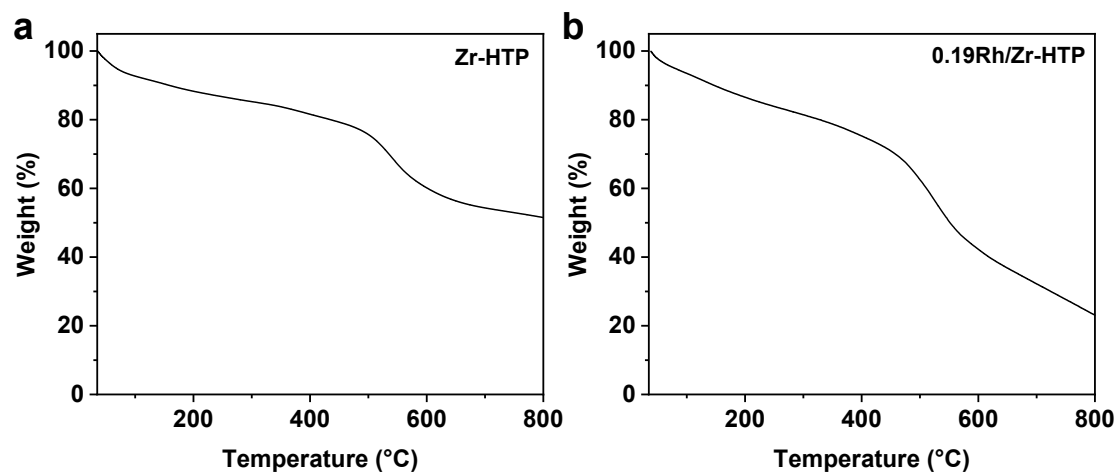

Fig. S3. TGA curves of Zr-HTP and 0.19Rh/Zr-HTP catalysts.

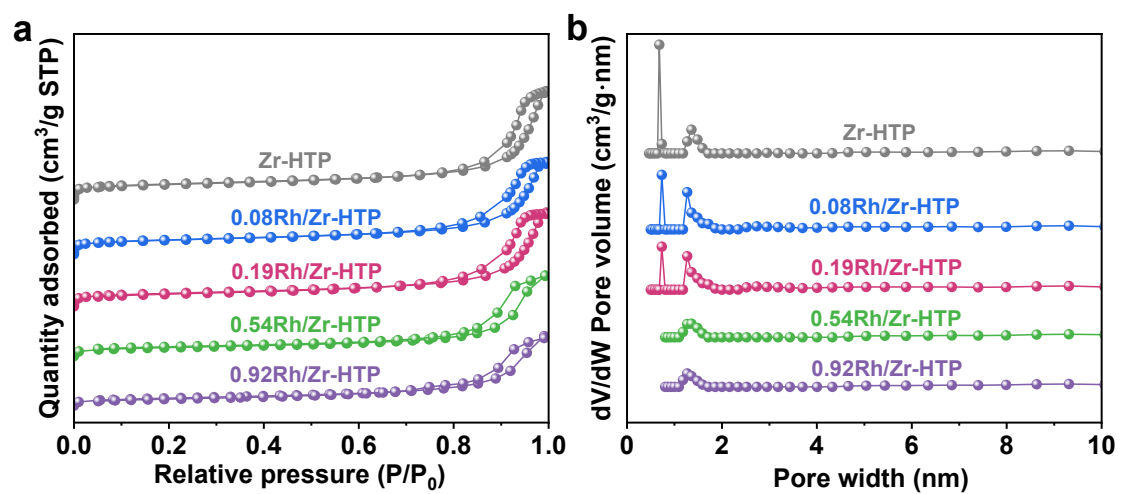

Fig. S4. N<sub>2</sub> sorption isotherms and pore size distributions of different Rh-based catalysts.

Table S3. Physicochemical properties of different Rh-based catalysts.

| Samples           | BET areas<br>(m <sup>2</sup> /g) | Micropore<br>areas<br>(m <sup>2</sup> /g) | Pore<br>volumes<br>(cm <sup>3</sup> /g) | Micropore<br>volumes<br>(cm <sup>3</sup> /g) | Micropore<br>ratio <sup>a</sup><br>(%) |
|-------------------|----------------------------------|-------------------------------------------|-----------------------------------------|----------------------------------------------|----------------------------------------|
| Zr-HTP            | 424                              | 173                                       | 1.03                                    | 0.072                                        | 7.0%                                   |
| 0.08Rh/Zr-<br>HTP | 395                              | 151                                       | 0.87                                    | 0.063                                        | 7.2%                                   |
| 0.19Rh/Zr-<br>HTP | 365                              | 145                                       | 0.90                                    | 0.059                                        | 6.5%                                   |
| 0.54Rh/Zr-<br>HTP | 254                              | 33                                        | 0.79                                    | 0.010                                        | 1.3%                                   |
| 0.92Rh/Zr-<br>HTP | 233                              | 24                                        | 0.70                                    | 0.007                                        | 1.0%                                   |

<sup>a</sup>[Micropore ratio] = [Micropore volumes]/[Pore volumes]

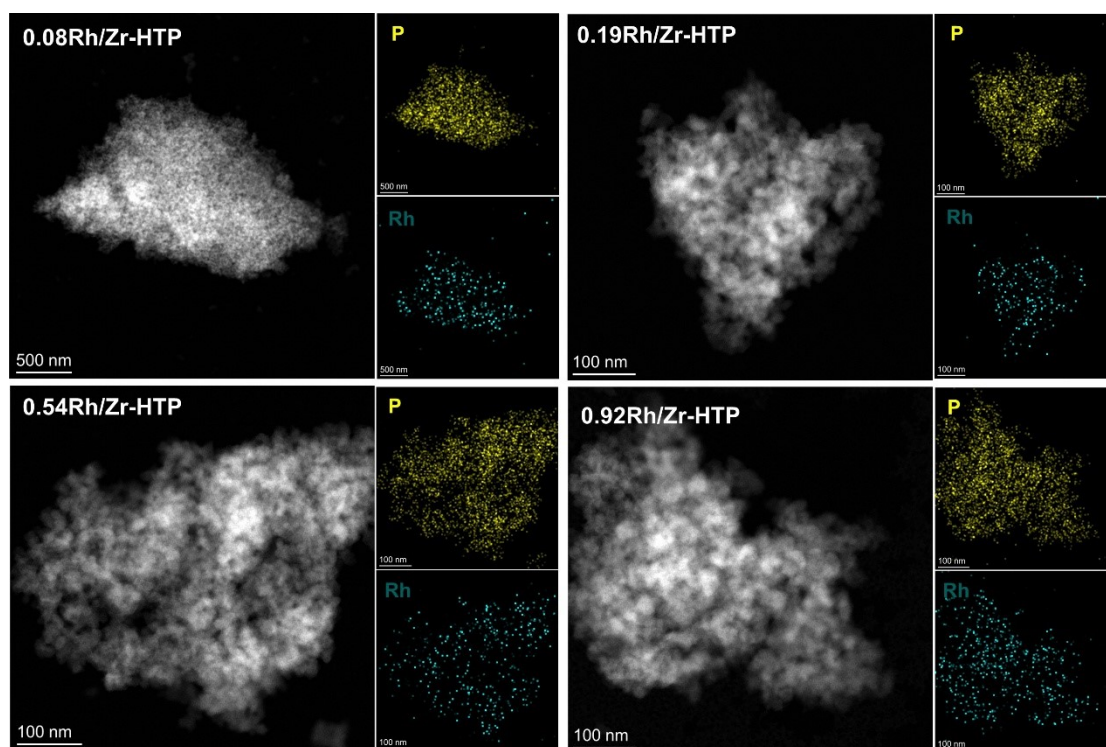

Fig. S5 The HAADF-STEM images of different catalysts and corresponding elemental mappings of Rh and P.

Table S4. Different catalysts for hydroformylation of styrene.<sup>a</sup>

| Entry | Catalysts                             | Con. (%) | Yield (%)    |            | i/n |
|-------|---------------------------------------|----------|--------------|------------|-----|
|       |                                       |          | iso-aldehyde | n-aldehyde |     |
| 1     | Zr-HTP <sup>b</sup>                   | -        | -            | -          | -   |
| 2     | Rh(CO) <sub>2</sub> (acac)            | 99       | 54.7         | 44.3       | 1.2 |
| 3     | Rh(PPh <sub>3</sub> ) <sub>3</sub> Cl | 82       | 42.3         | 39.7       | 1.1 |
| 4     | Rh/C                                  | 80       | 41.1         | 38.9       | 1.1 |
| 5     | 0.19Rh/Zr-HTP                         | 96       | 84.7         | 11.3       | 7.5 |

<sup>a</sup>Reaction conditions: 0.74  $\mu$ mol Rh-based catalysts, 3.0 mmol styrene, S/C= 4062, 3.0 ml toluene, 90 °C, 5.0 MPa syngas (CO/H<sub>2</sub>= 1:1), 4 h. <sup>b</sup>40 mg Zr-HTP catalyst.

Table S5. ICP-OES analysis of the 0.19Rh/Zr-HTP catalysts.

| Catalysts                        | Rh (wt%) |
|----------------------------------|----------|
| 0.19Rh/Zr-HTP (fresh)            | 0.19     |
| 0.19Rh/Zr-HTP (used seven times) | 0.19     |

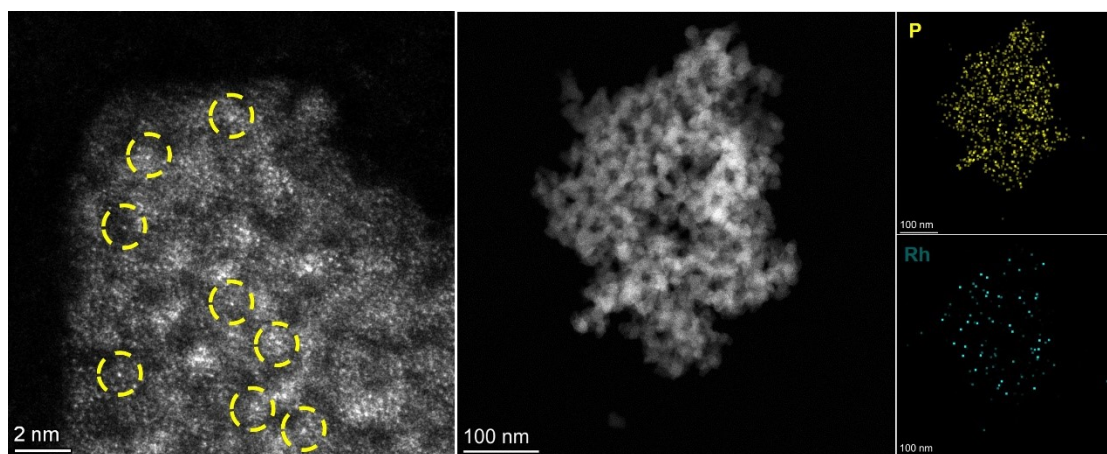

Fig. S6. The HAADF-STEM images of the spent 0.19Rh/Zr-HTP catalyst and corresponding elemental mappings of Rh and P.

Table S6. Comparison of the catalytic performance of the present catalysts with previously reported in the literature.

| Catalysts                              | Substrate      | P <sup>a</sup><br>(MPa) | T<br>(°C) | TOF<br>(h <sup>-1</sup> ) | i/n        | Ref.                 |
|----------------------------------------|----------------|-------------------------|-----------|---------------------------|------------|----------------------|
| Rh-HCP-PPh <sub>3</sub>                | styrene        | 3.0                     | 80        | 35.7                      | 12.7       | 1                    |
| Rh-PPh <sub>3</sub> /SiO <sub>2</sub>  | styrene        | 5.0                     | 60        | 239                       | 5.7        | 2                    |
| 2.3%Rh@POP                             | styrene        | 3.0                     | 80        | 679                       | 0.83       | 3                    |
| MOF-808-2.0DPPB-RhH                    | styrene        | 2.0                     | 110       | 239                       | 0.61       | 4                    |
| RhC <sub>x</sub> @S-1-400              | styrene        | 4.0                     | 85        | 737                       | 1.25       | 5                    |
| Rh/MnMOF                               | styrene        | 8.0                     | 80        | 55.6                      | 2.2        | 6                    |
| Rh/3%B-g-C <sub>3</sub> N <sub>4</sub> | styrene        | 6.0                     | 100       | 12000                     | 1.32       | 7                    |
| Rh/ECN(0.1)                            | styrene        | 2.0                     | 90        | 125                       | 1.6        | 8                    |
| Rh@POP-PTBA-HA-50                      | 1-octene       | 6.0                     | 120       | 801                       | 0.087      | 9                    |
| Rh/mPPh <sub>3</sub> &PPD-POP          | 1-octene       | 2.0                     | 110       | 2000                      | 0.063      | 10                   |
| <b>0.19Rh/Zr-HTP</b>                   | <b>styrene</b> | <b>5.0</b>              | <b>90</b> | <b>1462</b>               | <b>7.5</b> | <b>This<br/>work</b> |

<sup>a</sup>CO/H<sub>2</sub>=1:1

Table S7. Hydroformylation of various olefins under biphasic reaction conditions.<sup>a</sup>

| Substrate                                                                           | Con. (%) | Yield (%)    |            | i/n  |
|-------------------------------------------------------------------------------------|----------|--------------|------------|------|
|                                                                                     |          | iso-aldehyde | n-aldehyde |      |
| 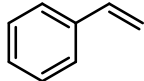   | 99       | 87.2         | 11.7       | 7.4  |
|    | 96       | 83.8         | 12.2       | 6.8  |
|    | 84       | 72.6         | 11.4       | 6.4  |
|    | 99       | 93.6         | 5.4        | 17.3 |
|   | 99       | 86.7         | 12.3       | 7.0  |
|  | 99       | 86.1         | 12.9       | 6.7  |
|  | 26       | -            | 26         | -    |
|  | 90       | -            | 90         | -    |
|  | -        | 46.8         | 48.1       | 1.0  |
|  | 99       | 47.2         | 51.8       | 0.9  |
|  | 99       | 39.3         | 57.7       | 0.7  |

<sup>a</sup>Reaction conditions: 40 mg 0.19Rh/Zr-HTP, 3.0 mmol olefins, S/C= 4062, 3.0 ml toluene, 90 °C, 5.0 MPa syngas (CO/H<sub>2</sub>= 1:1), 6 h. <sup>b</sup>The yield of iso-octene as byproduct was 2%.

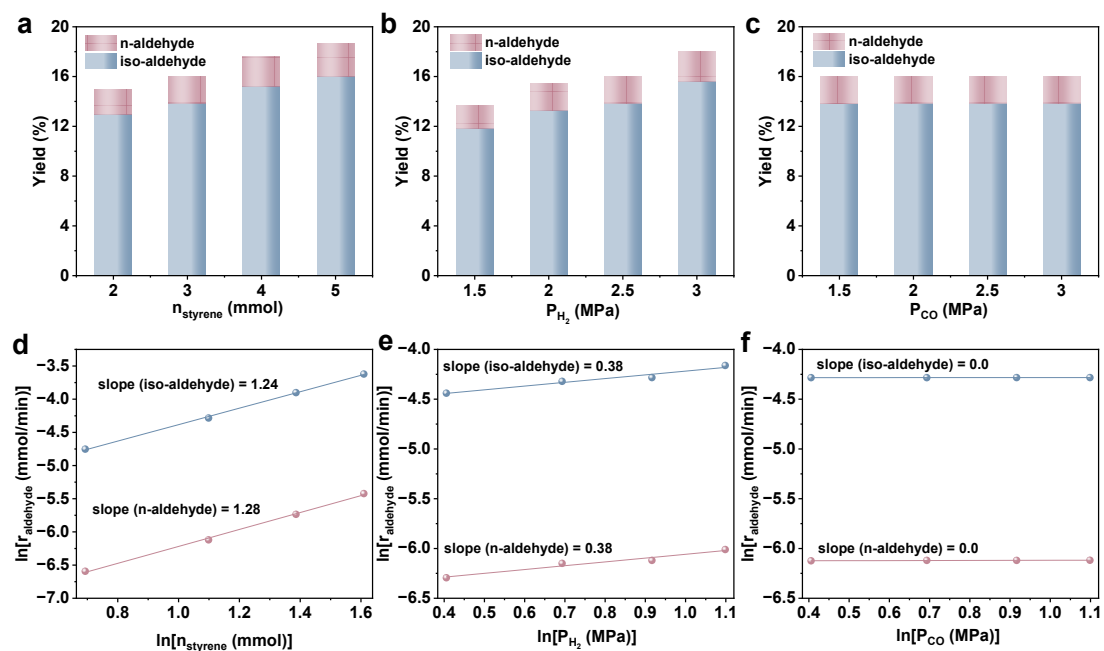

Fig. S7. Initial rate method and reaction order to the hydroformylation reaction of styrene toward (a, d) styrene, (b, e)  $H_2$  and (c, f)  $CO$ . Reaction conditions: 40 mg 0.19Rh/Zr-HTP catalyst (0.74  $\mu\text{mol}$  Rh), 3 mL toluene, 90  $^\circ\text{C}$ , 30 min. (a, d) 5 MPa syngas, 2/3/4/5 mmol styrene; (b, e) 3 mmol styrene, 2.5 MPa  $CO$ , 1.5/2/2.5/3 MPa  $H_2$ ; (c, f) 3 mmol styrene, 2.5 MPa  $H_2$ , 1.5/2/2.5/3 MPa  $CO$ .

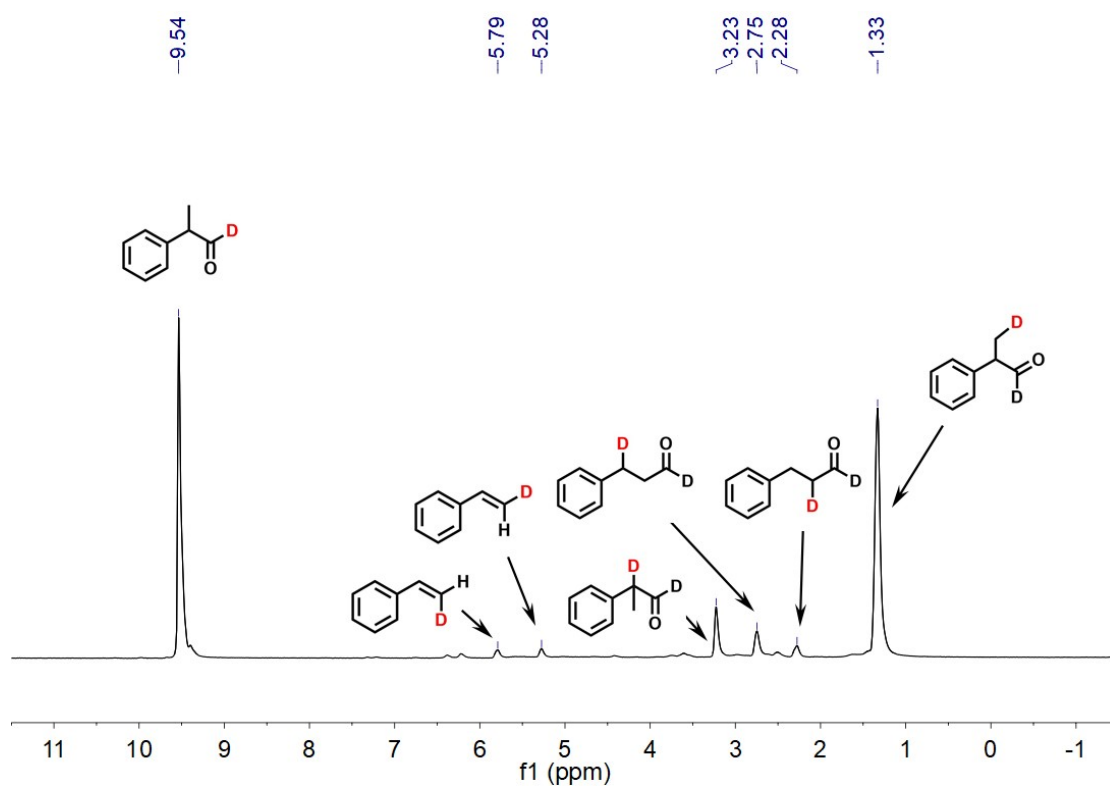

Fig. S8.  $^2\text{H}$  NMR spectrum (600 MHz) of reaction mixture after deuteroformylation. Reaction conditions: 5.0 mmol styrene, 40 mg 0.19Rh/Zr-HTP (molar ratio of styrene/Rh=1:6770), 4.0 mL toluene, 2.5 MPa CO, 2.5 MPa  $\text{D}_2$ , 90 °C and 6 h.

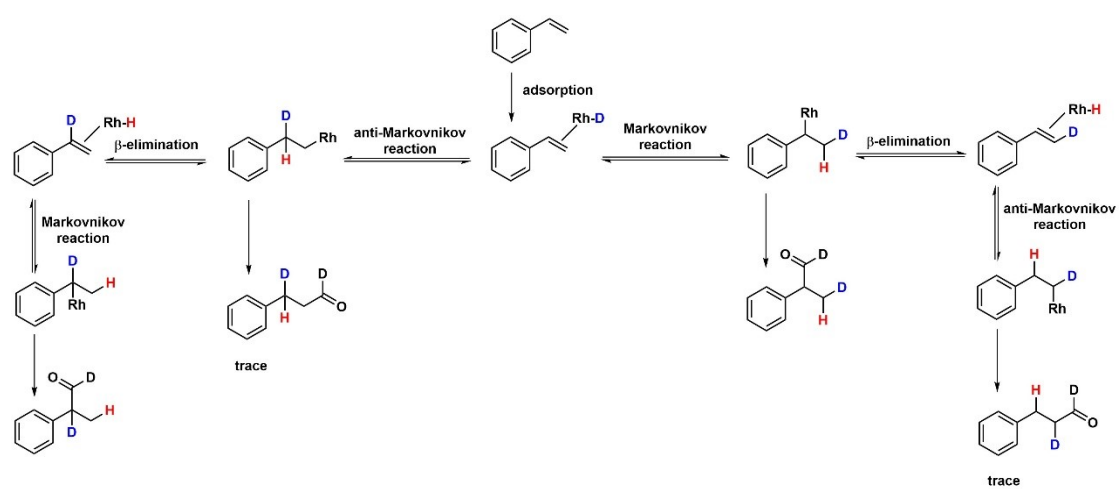

Fig. S9. Graphical representation of product distribution obtained from deuteroformylation of styrene.

## Reference

- [1] D. Wang, G. Zeng, J. Fang, H. Li, H. Chen, J. Ma and Z. Dong, *Chem. Eng. J.*, 2024, **482**, 148860. DOI: 10.1016/j.cej.2024.148860.
- [2] D. Han, X. Li, H. Zhang, Z. Liu, G. Hu and C. Li, *J. Mol. Catal. A-Chem.*, 2008, **283**, 15-22. DOI: 10.1016/j.molcata.2007.12.008.
- [3] M. Xu, D. Yang, H. Fang, Z. Sun, S. Tao, S. Yang, R. Li, H. Chen, C. Cheng, X. Wang, T. Ma and X. Zheng, *J. Catal.*, 2025, **443**, 115977. DOI: 10.1016/j.jcat.2025.115977.
- [4] P. Samanta, A. Solé-Daura, R. Rajapaksha, F. M. Wisser, F. Meunier, Y. Schuurman, C. Sassoie, C. Mellot-Draznieks and J. Canivet, *ACS Catal.*, 2023, **13**, 4193-4204. DOI: 10.1021/acscatal.3c00398.
- [5] L. Huang, J. Wang, Q. Liu, P. Sun, M. Nie, G. Gao, Z. Zhao, Z. Huang and F. Li, *J. Catal.*, 2025, **447**, 116095. DOI: 10.1016/j.jcat.2025.116095.
- [6] P. Tang, S. Paganelli, F. Carraro, M. Blanco, R. Riccò, C. Marega, D. Badocco, P. Pastore, C. J. Doonan and S. Agnoli, *ACS Appl. Mater. Interfaces*, 2020, **12**, 54798-54805. DOI: 10.1021/acsaami.0c17073.
- [7] Y. Shi, G. Ji, Q. Hu, Y. Lu, X. Hu, B. Zhu and W. Huang, *New J. Chem.*, 2020, **44**, 20-23. DOI: 10.1039/c9nj05385a.
- [8] L. Jurado, J. Esvan, L. A. Luque-Alvarez, L. F. Bobadilla, J. A. Odriozola, S. Posada-Pérez, A. Poater, A. Comas-Vives and M. R. Axet, *Catal. Sci. Technol.*, 2023, **13**, 1425-1436. DOI: 10.1039/d2cy02094g.
- [9] K. Zhao, H. Wang, X. Wang, T. Li, X. Dai, L. Zhang, X. Cui and F. Shi, *J. Catal.*, 2021, **401**, 321-330. DOI: 10.1016/j.jcat.2021.08.004.
- [10] G. Ji, C. Li, P. Gao, M. Jiang, L. Ma, G. Wang, G. Hou, L. Yan and Y. Ding, *Chem. Eng. J.*, 2023, **470**, 144334. DOI: 10.1016/j.cej.2023.144334.
